# Supplementary material
Source: HighWire-hosted journal article supplement (https://gh.bmj.com/content/7/10/e009801)
Supplement: inline-supplementary-material-1 [file inline-supplementary-material-1.pdf]

Supplementary Material

**Supplementary Figure 1:** Heat maps summarizing results of dose optimization with age cutoff determination for children 3-11 months old in the MORDOR morbidity trial.

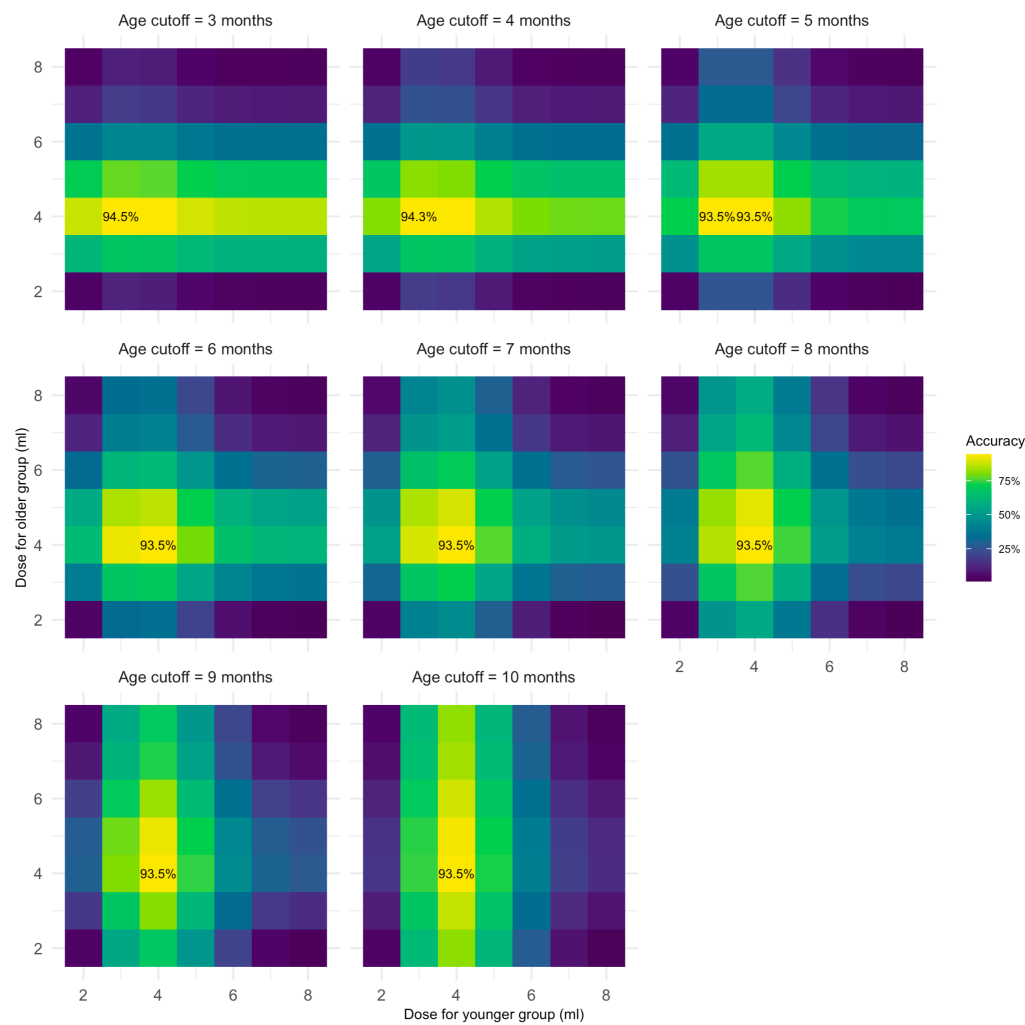

**Supplementary Figure 2:** Heat maps summarizing results of dose optimization with age cutoff determination for children 3-11 months old in the CHAT trial.

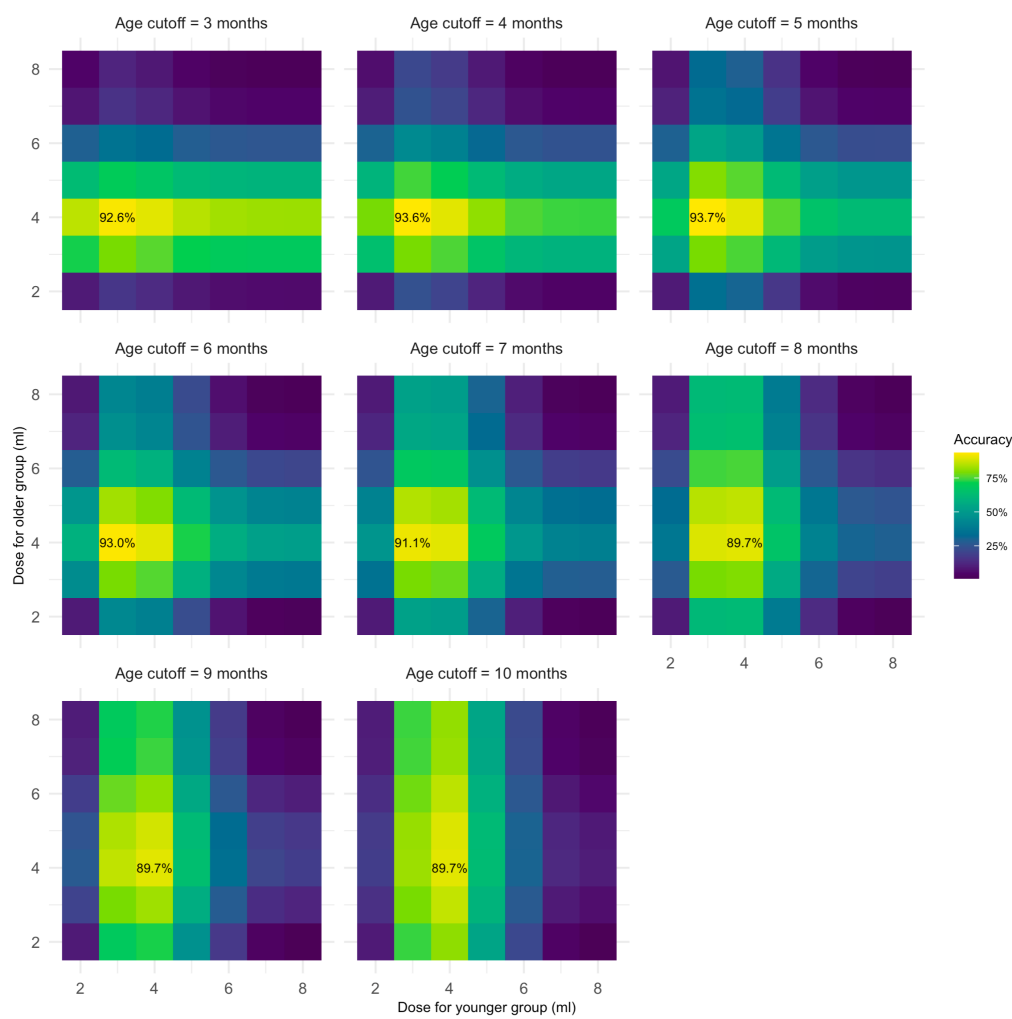

**Supplementary Table 1.** Sensitivity analysis for children 3-11 months old in the MORDOR and CHAT trials, without age cutoff determination and using tolerance limits of 20-40 mg/kg. Result with highest accuracy is highlighted.<sup>1</sup>

| Study (n)      | Dose          | Within Limits |       | Underdose |       | Overdose |       | Average dose (mg/kg) |
|----------------|---------------|---------------|-------|-----------|-------|----------|-------|----------------------|
|                |               | n             | %     | n         | %     | n        | %     |                      |
| MORDOR (3,713) | 80 mg (2 ml)  | 11            | 0.3%  | 3,702     | 99.7% | NA       | NA    | 11.0                 |
|                | 120 mg (3 ml) | 489           | 13.2% | 3,224     | 86.8% | NA       | NA    | 16.5                 |
|                | 160 mg (4 ml) | 2,517         | 67.8% | 1,186     | 31.9% | 10       | 0.3%  | 22.1                 |
|                | 200 mg (5 ml) | 3,478         | 93.7% | 158       | 4.3%  | 77       | 2.1%  | 27.6                 |
|                | 240 mg (6 ml) | 3,254         | 87.6% | 24        | 0.6%  | 435      | 11.7% | 33.1                 |
|                | 280 mg (7 ml) | 2,389         | 64.4% | 4         | 0.1%  | 1,320    | 35.6% | 38.6                 |
|                | 320 mg (8 ml) | 1,297         | 34.9% | 1         | 0.0%  | 2,415    | 65.0% | 44.1                 |
| CHAT (5,167)   | 80 mg (2 ml)  | 28            | 0.5%  | 5,139     | 99.5% | NA       | NA    | 11.7                 |
|                | 120 mg (3 ml) | 1,121         | 21.7% | 4,046     | 78.3% | NA       | NA    | 17.5                 |
|                | 160 mg (4 ml) | 4,078         | 78.9% | 1,080     | 20.9% | 9        | 0.2%  | 23.3                 |
|                | 200 mg (5 ml) | 4,855         | 94.0% | 96        | 1.9%  | 216      | 4.2%  | 29.2                 |
|                | 240 mg (6 ml) | 4,247         | 82.2% | 18        | 0.3%  | 902      | 17.5% | 35.0                 |
|                | 280 mg (7 ml) | 2,804         | 54.3% | NA        | NA    | 2,363    | 45.7% | 40.8                 |
|                | 320 mg (8 ml) | 1,344         | 26.0% | NA        | NA    | 3,823    | 74.0% | 46.7                 |

mg, milligram; mg/kg, milligrams per kilogram; ml, milliliter

<sup>1</sup>Percentages may not sum to 100% due to rounding.

**Supplementary Figure 3.** Distribution of doses that would have been given to children 1-11 months in the MORDOR morbidity trial if the existing height-based dosing pole were used to determine dose. Green dashed lines indicate tolerance limits of 15-30 mg/kg and orange dashed lines indicate tolerance limits of 20-40 mg/kg.

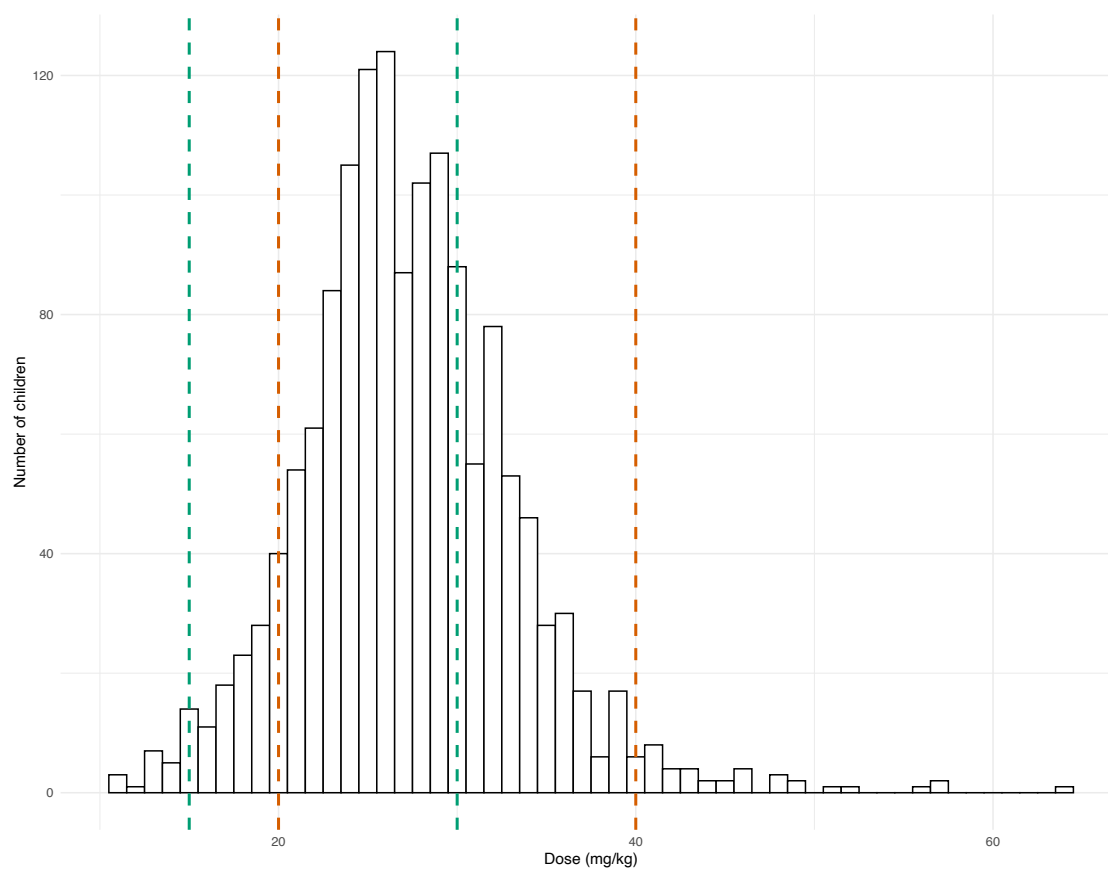

**Supplementary Table 2.** Top 5 results from height-based dose optimization for children 1-5 months old in the MORDOR morbidity trials (n=1405). Result with highest accuracy is highlighted for each set of analyses.<sup>1</sup>

| Tolerance limit<br>(mg/kg) | Height cutoff<br>(cm) <sup>2</sup> | Dose 1, shorter group | Dose 2, taller group | Within Limits |       | Underdose |      | Overdose |      |
|----------------------------|------------------------------------|-----------------------|----------------------|---------------|-------|-----------|------|----------|------|
|                            |                                    |                       |                      | n             | %     | n         | %    | n        | %    |
| 15-30                      | 60                                 | 120 mg (3 ml)         | 160 mg (4 ml)        | 1,366         | 94.0% | 23        | 1.6% | 65       | 4.5% |
|                            | 65                                 | 120 mg (3 ml)         | 160 mg (4 ml)        | 1,363         | 93.7% | 54        | 3.7% | 37       | 2.5% |
|                            | 65                                 | 120 mg (3 ml)         | 200 mg (5 ml)        | 1,322         | 90.9% | 45        | 3.1% | 87       | 6.0% |
|                            | 70                                 | 120 mg (3 ml)         | 160 mg (4 ml)        | 1,322         | 90.9% | 102       | 7.0% | 30       | 2.1% |
|                            | 70                                 | 120 mg (3 ml)         | 200 mg (5 ml)        | 1,321         | 90.9% | 95        | 6.5% | 38       | 2.6% |
| 20-40                      | 60                                 | 160 mg (4 ml)         | 200 mg (5 ml)        | 1,388         | 95.5% | 27        | 1.9% | 39       | 2.7% |
|                            | 65                                 | 160 mg (4 ml)         | 200 mg (5 ml)        | 1,365         | 93.9% | 58        | 4.0% | 31       | 2.1% |
|                            | 65                                 | 160 mg (4 ml)         | 240 mg (6 ml)        | 1,357         | 93.3% | 46        | 3.2% | 51       | 3.5% |
|                            | 55                                 | 120 mg (3 ml)         | 200 mg (5 ml)        | 1,333         | 91.7% | 35        | 2.4% | 86       | 5.9% |
|                            | 55                                 | 160 mg (4 ml)         | 200 mg (5 ml)        | 1,327         | 91.3% | 18        | 1.2% | 109      | 7.5% |

cm, centimeter; mg, milligram; mg/kg, milligrams per kilogram; ml, milliliter

<sup>1</sup>Percentages may not sum to 100% due to rounding.

<sup>2</sup>Height cutoffs refer to the height at which the shorter group ends. For example, a height cutoff of 60 indicates a shorter group of ≤ 60 cm and a taller group of > 60 cm.
